# Supplementary material
Source: PubMed Central journal article supplement (PMC4168329)
Supplement: gf415sup_10-1055-s-0031-1280470.pdf [file gf415sup_10-1055-s-0031-1280470.pdf]

# Einflussfaktoren auf die Stildauer im Freiburger Geburtenkollektiv (FreiStill)

## Factors Associated with the Duration of Breastfeeding in the Freiburg Birth Collective, Germany (FreiStill)

## Autoren

R. Rasenack<sup>1</sup>, C. Schneider<sup>1</sup>, E. Jahnz<sup>1</sup>, J. Schulte-Mönting<sup>2</sup>, H. Prömpeler<sup>1</sup>, M. Kunze<sup>1</sup>

## Institute

<sup>1</sup> Universitäts-Frauenklinik Freiburg, Freiburg i. Br.<sup>2</sup> Institut für medizinische Biometrie und Informatik der Albert-Ludwigs-Universität, Freiburg i. Br.

## Schlüsselwörter

- Stillen
- Entbindungskliniken
- Säuglingsernährung
- babyfreundliches Krankenhaus
- Muttermilch

## Key words

- breastfeeding
- maternity hospitals
- infant nutrition
- baby-friendly hospital
- lactation

## Zusammenfassung

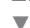

**Fragestellung:** Die gesundheitlichen Vorteile für Mutter und Neugeborenes durch Stillen sind gut belegt. Die Untersuchung sollte klären, welche Variablen einen Stillerfolg bedingen.

**Methode:** 443 Mütter wurden in einer prospektiven multizentrischen Kohortenstudie am 1. postpartalen Tag persönlich standardisiert befragt. Frauen, die zu stillen begonnen hatten, wurden nach 3, 6 und 12 Monaten telefonisch interviewt. Die statistische Analyse wurde mit SAS 9 durchgeführt.

**Ergebnisse:** Die initiale Stillquote lag bei 92% (409/443). Nach 3 Monaten stillten noch 74%, nach 6 Monaten 61% und nach 12 Monaten 28%. Der bivariate Test ergab eine signifikant positive Korrelation zum Stillen für ältere Mütter, längere Ausbildungsdauer, vorbestehende Stillabsicht, starke Stillmotivation nach 3 Monaten, Unterstützung der Stillentscheidung durch den Partner, Zufriedenheit mit der Betreuung in der Geburtsklinik, positives Erleben der Stillerrfahrung und Nachsorge durch eine Hebamme. Eine negative Korrelation lag vor für primäre Sectio, Gebrauch von Hilfsmitteln zum Stillen, frühes Zufüttern und Zweifeln an der Milchmenge. In der multivariaten logistischen Regression hatten 4 Variablen einen signifikant positiven Einfluss auf die Stildauer: längere Ausbildungsdauer, Zufriedenheit mit der Betreuung in der Geburtsklinik, Nachsorge durch eine Hebamme und positives Erleben der aktuellen Stillerrfahrung.

**Schlussfolgerung:** Unsere Untersuchung zeigt, dass es beeinflussbare Faktoren für die Stillbeziehung gibt. Kompetente Betreuung in der Geburtsklinik, Nachsorge durch eine Hebamme und ein positives Erleben des Stillens erhöht die Stillrate und hat somit einen wesentlichen Effekt auf die Gesundheit des Neugeborenen und der Mutter.

## Abstract

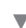

**Purpose:** The health benefits of breastfeeding for both infants and mothers are well-documented. The aim of this study was to clarify factors associated with successful breastfeeding.

**Methods:** We performed a prospective, multi-centre cohort study of 443 mothers in person using a standardised questionnaire on postpartum day 1. Women who had started to breast-feed were interviewed by telephone after 3, 6 and 12 months. A statistical analysis was performed using the SAS system.

**Results:** 92% of women (409/443) were initially breastfeeding. After three months the rate decreased to 74%, after six months to 61% and after 12 months to 28%, respectively. Bivariate analysis revealed a significant positive association with the following factors: maternal age > 35 years, higher educational level, intention to breastfeed on postpartum day one, high motivation after three months, partner's support of the decision to breastfeed, satisfaction with the care provided in the maternity clinic, a positive breastfeeding experience and follow-up care by a midwife. Elective caesarean delivery, the use of breastfeeding aids, formula supplementation early on and the mother's concern about the amount of milk correlated negatively. Following a multivariate logistic regression analysis, four factors were correlated with having a positive influence on duration of breastfeeding: higher educational level, satisfaction with the care provided within the maternity clinic, follow-up care by a midwife, and a positive current experience of breastfeeding.

**Conclusion:** Our data demonstrate certain factors successfully influence breastfeeding. Competent care in the maternity clinic, postpartum care by a midwife and a positive experience with breastfeeding increase the rate of breastfeeding and thus have a positive impact on the health of mother and newborn.

eingereicht 13.9.2011

revidiert 24.10.2011

akzeptiert 19.11.2011

## Bibliografie

**DOI** <http://dx.doi.org/10.1055/s-0031-1280470>  
 Geburtsh Frauenheilk 2012; 72:  
 1–7 © Georg Thieme Verlag KG  
 Stuttgart · New York ·  
 ISSN 0016-5751

## Korrespondenzadresse

**Dr. Regina Rasenack**  
 Universitätsfrauenklinik  
 Hugstetterstraße 55  
 79106 Freiburg  
[regina.rasenack@uniklinik-freiburg.de](mailto:regina.rasenack@uniklinik-freiburg.de)

## Einführung

In den letzten Jahren gibt es zunehmend Berichte über die gesundheitspolitische Bedeutung des Stillens auch in Industrienationen [10]. Gestillte Kinder haben eine nachweisbare Risikoreduktion für akute Otitis media, Gastroenteritis, Respirationstraktinfektionen, atopische Dermatitis, Asthma, Übergewicht, Typ-I- und -II-Diabetes, Leukämie, plötzlichen Kindstod sowie nekrotisierende Enterokolitis, vor allen Dingen bei Frühgeburten [11]. Auch für die Mütter ist ein deutlich positiver Effekt des Stillens auf die Gesundheit bekannt. Stillen senkt die Wahrscheinlichkeit für Typ-II-Diabetes, metabolisches Syndrom, Mamma- und Ovarialkarzinom und postpartale Depression [10,11,25]. Die Kosten durch Nichtstillen im Vergleich zu 6-monatigem Stillen von 90% der Kinder wurden für die USA für das Jahr 2001 auf 13 Milliarden US-Dollar geschätzt. Es hätten bei einer konservativen Schätzung 911 zusätzliche Säuglingstodesfälle verhindert werden können [1]. Das geburtshilfliche Team nimmt in der Beratung und Betreuung von Mutter und Neugeborenem in Schwangerschaft, rund um die Geburt und in den ersten Tagen post partum zur Realisierung einer erfolgreichen Stillbeziehung eine Schlüsselstellung ein. Die Betreuung im Krankenhaus nach der Geburt beeinflusst die Häufigkeit und Dauer des Stillens. Die von WHO und Unicef formulierten „10 Schritte zum erfolgreichen Stillen“ sowie die babyfreundliche Krankenhausinitiative strukturieren und fördern den Prozess der Laktationsaufnahme und die Dauer des Stillens allgemein [7,19].

Nach einem Tiefpunkt der Stillfrequenz in den 70er-Jahren erfolgte eine Zunahme und längere Dauer des Stillens in Deutschland ab etwa 1980 [16].

Ziel der vorliegenden Arbeit war die Beantwortung der Frage, welche Frauen im Freiburger Geburtenkollektiv ihre Kinder mindestens 6 Monate stillen, welche soziodemografischen Variablen sich positiv und negativ auf das Stillen auswirken, welche Einflüsse Geburtsort, Geburtsart und eine professionelle Betreuung haben.

## Methode

Im Rahmen von 2 Doktorarbeiten wurde eine prospektive, longitudinale und multizentrische Kohortenstudie durchgeführt [12, 21].

Die beiden Doktorandinnen interviewten standardisiert insgesamt 443 Wöchnerinnen, die zwischen August und Dezember 2007 von einem lebenden Kind entbunden wurden, davon 219 in der Universitäts-Frauenklinik, 216 im Evangelischen Diakonie-Krankenhaus und 8 im Geburtshaus Mayenrain in Freiburg. Die Untersuchung war von der Ethikkommission des Universitätsklinikums befürwortet worden. Die Wöchnerinnen bekamen eine schriftliche Information über die Untersuchung und unterschrieben eine Einwilligungserklärung. Ausschlusskriterien waren Alter unter 18 Jahre, fehlende Deutschkenntnisse, fehlendes Telefon, medizinische Kontraindikationen gegen das Stillen sowie die Geburt von Mehrlingen. Die 443 Wöchnerinnen umfassten etwa ein Drittel der Gesamtgeburtenszahl im Rekrutierungszeitraum in diesen 3 Einrichtungen. Die Universitäts-Frauenklinik und das Diakonie-Krankenhaus sind von der babyfreundlichen Krankenhausinitiative zertifizierte Geburtskliniken. Das Geburtshaus Mayenrain wird von freiberuflich tätigen Hebammen betreut. Das 1. Interview fand zum Zeitpunkt T0 am Tag nach der Geburt statt und wurde von je einer Doktorandin im Krankenhauszimmer

der Patientin geführt. Die Teilnehmerinnen des Geburtshauses wurden am 1. Tag nach der Geburt zu Hause besucht.

Nach einer Vorstudie zur Optimierung des standardisierten Interviews betrug die durchschnittliche Dauer dieses Erstinterviews 10 Minuten. Nach 3 (T1), 6 (T2) und 12 (T3) Monaten wurden die Frauen, die eine Stillbeziehung aufgenommen hatten, strukturiert telefonisch interviewt. Das letzte Interview fand statt, nachdem die Patientin abgestillt hatte oder das Kind 12 Monate alt war. Die durchschnittliche Dauer der telefonischen Befragung war zum Zeitpunkt T1 11 Minuten, zum Zeitpunkt T2 7 Minuten und 6 Minuten bei der Befragung nach 12 Monaten. Patientinnen, die telefonisch nicht erreicht werden konnten, wurden über eine schriftliche Benachrichtigung oder die betreuenden Frauenärzte kontaktiert. 11 Patientinnen schieden vorzeitig aus: 6 waren nicht mehr erreichbar, 3 verzogen ins nicht europäische Ausland, 1 Kind wurde in eine Pflegefamilie abgegeben und 1 Frau lehnte die weitere Teilnahme ab. Die Follow-up-Quote lag somit bei 97,5%. Alle „Drop outs“ wurden als abgestillt bewertet.

Die statistische Analyse wurde mit SAS 9 durchgeführt. Die bivariate Analyse erfolgte mit Kontingenztafeln und mithilfe des  $\chi^2$ -Tests. Die Signifikanzgrenze wurde mit 5% festgelegt. Die logistische Regressionsanalyse wurde multivariat, binär mit Backward Elimination durchgeführt, um die Zusammenhänge der verschiedenen Einflussvariablen abschätzen zu können.

## Ergebnisse

In unserem Kollektiv nahmen 92% (409/443) eine Stillbeziehung auf, 8% (34/443) entschieden sich für primäres Abstillen. Als häufigster Grund wurden schlechte Erfahrungen bei vorangegangenen Entbindungen genannt. Zum Zeitpunkt T1 (3 Monate) stillten noch 74% der Frauen, zum Zeitpunkt T2 (6 Monate) 61% und nach 12 Monaten (T3) 28%.

● **Abb. 1** zeigt den Abfall der Stillquote als Kaplan-Meier-Kurve mit dem steilsten Abfall nach 2 Monaten. Häufigster Abstillgrund der Stillbeginner war mit 24% „vermeintlich zu wenig Muttermilch“, gefolgt von der Angabe „Kind wollte nicht mehr“ (14%) und „Mutter wollte nicht mehr“ (14%). Andere Gründe waren zu viel Stress (11%), gesundheitliche Probleme (9%), Brustprobleme (8%), „war an der Zeit“ (6%), Stillverwirrung (5%), Aufnahme von Berufstätigkeit (5%) und schlechte Vorerfahrung (4%).

Bei bivariater Analyse, stratifiziert nach Status zum Zeitpunkt T2 (nach 6 Monaten) Patientin stillt weiter vs. Patientin hat abgestillt, ergaben sich folgende Ergebnisse (● **Tab. 1**):

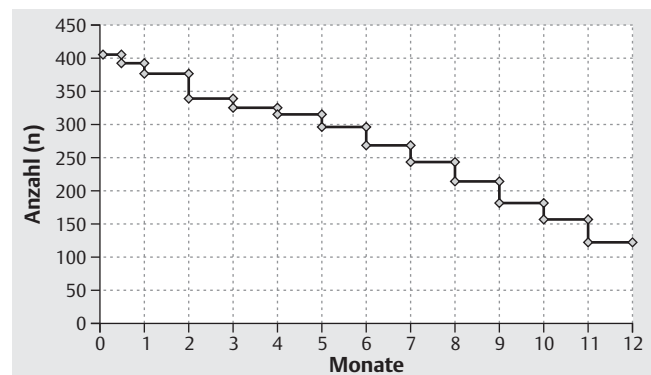

**Abb. 1** Anzahl der Stillenden von Geburt (0 Monate) bis 1 Jahr pp.

**Tab. 1** Stillen und Nichtstillen zum Zeitpunkt T2 (6 Monate).

| Parameter                 | Stillen |       | Nichtstillen |       | p-Wert  |
|---------------------------|---------|-------|--------------|-------|---------|
|                           | n       | %     | n            | %     |         |
| Alter                     |         |       |              |       |         |
| ▶ 18 bis 25 Jahre         | 25      | 46,3% | 29           | 53,7% | **      |
| ▶ 26 bis 34 Jahre         | 160     | 67,8% | 76           | 32,2% | 0,002   |
| ▶ 35 Jahre und älter      | 85      | 72,7% | 32           | 27,4% |         |
| Migrationshintergrund     |         |       |              |       |         |
| ▶ ja                      | 81      | 60,9% | 52           | 39,1% | n.s.    |
| ▶ nein                    | 189     | 69,0% | 85           | 31%   | 0,1322  |
| Bildungsniveau            |         |       |              |       |         |
| ▶ < 10 Jahre              | 12      | 35,3% | 22           | 64,7% | ***     |
| ▶ 10 bis 11 Jahre         | 126     | 58,6% | 89           | 41,4% | <0,0001 |
| ▶ > 11 Jahre              | 127     | 83%   | 26           | 17%   |         |
| Frühgeburt                |         |       |              |       |         |
| ▶ ja                      | 24      | 55,8% | 19           | 44,2% | n.s.    |
| ▶ nein                    | 246     | 67,6% | 118          | 32,4% | 0,1695  |
| Gravidität                |         |       |              |       |         |
| ▶ 1                       | 127     | 69,8% | 55           | 30,2% | n.s.    |
| ▶ > 1                     | 143     | 63,6% | 82           | 36,4% | 0,2241  |
| Parität                   |         |       |              |       |         |
| ▶ 1                       | 146     | 67,9% | 69           | 32,1% | n.s.    |
| ▶ > 1                     | 124     | 64,6% | 68           | 35,4% | 0,5463  |
| Geburtsmodus              |         |       |              |       |         |
| ▶ Spontangeburt           | 136     | 68,7% | 62           | 31,3% | *       |
| ▶ vag. operativ           | 19      | 73,1% | 7            | 26,9% |         |
| ▶ sekundäre Sectio        | 69      | 71,1% | 28           | 28,9% |         |
| ▶ primäre Sectio          | 46      | 53,5% | 40           | 46,5% | 0,038   |
| Vorerfahrung              |         |       |              |       |         |
| ▶ positiv                 | 99      | 72,3% | 38           | 27,7% | **      |
| ▶ gemischt                | 19      | 63,3% | 11           | 36,7% |         |
| ▶ negativ                 | 5       | 26,3% | 14           | 73,7% | 0,004   |
| Zufüttern am 1. LT        |         |       |              |       |         |
| ▶ kein Zufüttern am 1. LT | 236     | 68,8% | 107          | 31,2% | *       |
| ▶ Glukoselösung           | 10      | 58,8% | 7            | 41,2% | 0,0434  |
| ▶ Formula zusätzlich      | 24      | 51,1% | 23           | 48,9% |         |
| Hilfsmittel am 1. LT      |         |       |              |       |         |
| ▶ Hilfsmittel am 1. LT    | 57      | 53,3% | 50           | 46,7% | **      |
| ▶ keine Hilfsmittel       | 213     | 71%   | 87           | 29%   | 0,001   |
| Schnuller                 |         |       |              |       |         |
| ▶ mit 3 Monaten           | 178     | 60,5% | 116          | 39,5% | ***     |
| ▶ kein Schnuller          | 87      | 80,6% | 21           | 19,4% | 0,0003  |
| Stillplanung              |         |       |              |       |         |
| ▶ Stillplanung am 1. LT   | 242     | 69,5% | 106          | 30,5% | **      |
| ▶ keine Stillabsicht      | 28      | 47,5% | 31           | 52,5% | 0,0015  |
| Stillleben mit T1         |         |       |              |       |         |
| ▶ positiv                 | 224     | 75,2% | 74           | 24,8% | ***     |
| ▶ gemischt                | 19      | 52,8% | 17           | 47,2% |         |
| ▶ negativ                 | 22      | 32,4% | 46           | 67,7% | <0,0001 |

| Parameter                   | Stillen |       | Nichtstillen |       | p-Wert  |
|-----------------------------|---------|-------|--------------|-------|---------|
|                             | n       | %     | n            | %     |         |
| ▶ Übereinstimmung T1        | 199     | 76,8% | 60           | 23,2% | ***     |
| ▶ keine Übereinstimmung     | 66      | 46,2% | 77           | 53,9% | 0,0005  |
| Stillmotivation T1          |         |       |              |       |         |
| ▶ sehr stark                | 164     | 89,6% | 19           | 10,4% | ***     |
| ▶ stark                     | 82      | 77,4% | 24           | 22,6% |         |
| ▶ weniger oder schwach      | 18      | 50%   | 18           | 50%   | <0,0001 |
| ▶ Zweifel an Milchmenge     | 22      | 39,3% | 34           | 60,7% | ***     |
| ▶ keine Zweifel T1          | 242     | 89,6% | 28           | 10,4% | <0,0001 |
| ▶ Unterstützung Partner     | 215     | 69,6% | 94           | 30,4% | *       |
| ▶ keine Unterstützung       | 45      | 54,2% | 38           | 45,8% | 0,018   |
| ▶ Erkrankung Mutter         | 36      | 62,1% | 22           | 37,9% | n.s.    |
| ▶ Allergie                  | 42      | 63,6% | 24           | 36,4% |         |
| ▶ ohne Krankheit            | 191     | 68,2% | 89           | 31,8% | 0,7131  |
| ▶ Wochenbett-depression     | 7       | 46,7% | 8            | 53,3% | n.s.    |
| ▶ keine Depression T1       | 258     | 66,7% | 129          | 33,3% | 0,1849  |
| ▶ gesunde Neugeborene       | 243     | 68,5% | 112          | 31,5% | n.s.    |
| ▶ angeborene Fehlbildung    | 3       | 42,9% | 4            | 57,2% |         |
| ▶ akute Krankheit           | 3       | 37,5% | 5            | 62,5% | 0,1004  |
| ▶ Verlegung auf NICU        | 17      | 51,5% | 16           | 48,5% | n.s.    |
| ▶ keine Trennung            | 253     | 67,7% | 121          | 32,4% | 0,0915  |
| Geburtsort                  |         |       |              |       |         |
| ▶ Universitäts-frauenklinik | 121     | 60,2% | 80           | 39,8% | **      |
| ▶ Diakonie-Krankenhaus      | 141     | 71,2% | 57           | 28,8% |         |
| ▶ Geburtshaus               | 8       | 100%  | 0            |       | 0,008   |
| ▶ mit Betreuung zufrieden   | 217     | 69,1% | 97           | 30,9% | *       |
| ▶ unzufrieden in der Klinik | 52      | 56,5% | 40           | 43,5% | 0,0340  |
| Nachbetreuung               |         |       |              |       |         |
| ▶ Hebamme                   | 207     | 67%   | 102          | 33%   | **      |
| ▶ keine Hebamme             | 8       | 34%   | 15           | 66%   | 0,0021  |
| Nachsorge                   |         |       |              |       |         |
| ▶ positiv                   | 234     | 69,4% | 103          | 30,6% | **      |
| ▶ negativ                   | 31      | 47,7% | 34           | 52,3% | 0,0012  |

n.s.: nicht signifikant, \* signifikant, \*\* hoch signifikant, \*\*\* sehr hoch signifikant, LT: Lebenstag, NICU: Neonatal Intensive Care Unit.

Die älteren Frauen stillen statistisch signifikant häufiger länger als die jüngeren Mütter.

Mütter ohne Migrationshintergrund stillten öfter länger als 6 Monate im Vergleich zu Frauen mit Migrationshintergrund. Dieser Unterschied zeigt eine Tendenz, ohne statistisch signifikant zu sein.

Ein entscheidender Faktor war das Bildungsniveau. Frauen ohne Abschluss oder nur mit Hauptschulabschluss hatten zu 64,7% nach 6 Monaten abgestillt, bei einem mittleren Bildungsabschluss hatten 41,4% und bei einer über 11-jährigen Schulbildung hatten 17% nach 6 Monaten das Stillen eingestellt.

Eine Tendenz, über 6 Monate gestillt zu werden, gibt es für Kinder, die als reife Neugeborene zur Welt kommen (37+1.SSW). Dieser Unterschied ist bei der kleinen Fallzahl Frühgeborener (n = 43) nicht signifikant.

Der Einfluss der Zahl der Schwangerschaften sowie der Parität ist nicht signifikant.

Beim Geburtsmodus ist eine statistisch signifikante negative Beeinflussung durch die primäre Sectio erkennbar.

Signifikant ist der Einfluss des subjektiven Erlebens der Stillföhrung bei einem vorangegangenen Kind. Frauen mit positiver Vorerfahrung stillen ein weiteres Kind häufiger länger als 6 Mo-

nate als Frauen mit gemischter Vorerfahrung oder gar nach negativer Vorerfahrung.

Die Stillsituation am 1. postpartalen Tag hat einen erheblichen Einfluss auf die Dauer des Stillens. Frauen, die ihr Kind nach der Geburt ausschließlich an der Brust ernähren können, stillen ihre Kinder häufiger länger als 6 Monate. Wird zusätzlich Glukose-lösung oral verabreicht, ist der Anteil länger gestillter Kinder geringer, bei Zufüttern mit Milchnahrung am 1. postpartalen Tag sinkt der Anteil länger als 6 Monate gestillter Kinder deutlich.

Ebenfalls statistisch signifikant ist die Korrelation zwischen dem Gebrauch von Hilfsmitteln (Milchpumpe, Flaschenfütterung, Stillhütchen und Brustwarzenformer) am 1. Tag nach der Geburt und der Stilldauer. Werden keine Stillhilfsmittel benötigt, ist der Prozentsatz von länger als 6 Monate gestillten Kindern größer als bei Neugeborenen, bei denen ein Hilfsmittel benötigt wird.

Eine hoch signifikante Korrelation ist für Kinder zu verzeichnen, die im Alter von 3 Monaten einen Schnuller bekommen. Kinder ohne Schnullergebrauch werden häufiger länger als 6 Monate gestillt im Vergleich zu Kindern, bei denen ein Schnuller benutzt wird.

Die bestehende Absicht zu stillen am Tag nach der Geburt ist statistisch signifikant korreliert mit einer längeren Stilldauer. Bei fester Stillplanung stillen nach 6 Monaten noch deutlich mehr Frauen ihre Kinder als ohne Planung.

Wird die Stillzeit nach 3 Monaten positiv erlebt, ist die Wahrscheinlichkeit deutlich größer, dass Kinder länger als 6 Monate gestillt werden. Bei rein positivem Erleben werden nach 6 Monate noch viele Kinder gestillt, bei gemischtem Erleben sind es weniger, bei negativem Erleben der Stillzeit nach 3 Monaten werden nur noch wenige Kinder länger als 6 Monate gestillt.

Auch die Übereinstimmung zwischen Vorstellung des Stillens und dem tatsächlichen Erleben nach 3 Monaten wirkt sich positiv auf die Stilldauer aus.

Die Motivation nach 3 Monaten ist statistisch signifikant korreliert mit der Dauer des Stillens. Sehr stark motivierte Frauen stillen häufig länger als 6 Monate, während weniger und schwach motivierte Frauen ihre Kinder seltener länger als 6 Monate stillen.

Hoch signifikant ist der Zweifel der Mutter, ob die produzierte Milchmenge zum Zeitpunkt T1, d. h. nach 3 Monaten, ausreicht oder nicht. Besteht kein Zweifel, stillt die Mehrheit der Mütter länger als 6 Monate, bei Zweifeln sind es nur noch 39,3% der Frauen.

Wird die Entscheidung zu stillen vom Partner unterstützt, ist eine Korrelation zu längeren Stilldauern erkennbar. Frauen mit unterstützenden Partnern stillen ihre Kinder häufiger länger als 6 Monate im Vergleich zu fehlender Unterstützung der Stillentscheidung.

Eine Erkrankung der Mutter war ohne statistische Signifikanz auf die Stilldauer.

Eine Wochenbettdepression zum Zeitpunkt des Interviews nach 3 Monaten war bei 15 Frauen diagnostiziert worden. Sieben dieser betroffenen Frauen stillten ihre Kinder länger als 6 Monate im Vergleich zur Mehrheit der Frauen ohne Wochenbettdepression. Dieser Unterschied ist bei der kleinen Fallzahl nicht signifikant.

Ähnlich wie bei den frühgeborenen Kindern sind auch Kinder mit anderen Besonderheiten wie angeborenen Fehlbildungen oder Krankheiten wahrscheinlicher mit 6 Monaten abgestillt. Im Vergleich zu gesunden Kindern, die mehrheitlich länger als 6 Monate gestillt wurden, hatten weniger als die Hälfte der Kinder mit angeborenen Fehlbildungen und Kinder mit anderen Krankheiten noch seltener eine längere Stillzeit als 6 Monate. Auch in die-

sem Fall scheitert die Signifikanz an der kleinen Zahl. Auch eine Verlegung des Kindes auf die neonatologische Intensivstation reduziert die Wahrscheinlichkeit für längeres Gestilltwerden. Erneut scheitert die statistische Signifikanz an der kleinen Fallzahl. Die Betrachtung des Geburtsorts lässt eine Korrelation zur Stilldauer erkennen. Kinder, die in der Universitäts-Frauenklinik geboren wurden, werden weniger häufig länger als 6 Monate gestillt als Kinder aus dem Diakonie-Krankenhaus. Dieser Unterschied ist signifikant und resultiert aus den unterschiedlichen Patientinnenkollektiven. Alle Kinder, die im Geburtshaus zur Welt kamen, hatten eine längere Stillzeit. Bei der kleinen Fallzahl ( $n=8$ ) ist keine statistische Auswertung möglich.

Frauen, die mit der Betreuung in der Geburtsklinik zufrieden waren, stillten länger als 6 Monate im Vergleich zu den unzufriedenen Frauen. Ein Einfluss auf die Stilldauer ist auch durch die Nachsorge im Wochenbett zu verzeichnen. Durch eine Hebamme nachbetreute Frauen stillten häufiger länger als 6 Monate. Wurde die Nachsorge von den Frauen als positiv empfunden, war der Prozentsatz über 6 Monate Stillender signifikant höher als bei Frauen mit unbefriedigender Nachsorgesituation.

In der multivariaten logistischen Regression hatten 2 Variablen einen unabhängigen, signifikant positiven Einfluss und 2 Variablen einen negativen Einfluss auf die Stilldauer:

1. Ausbildungsdauer der Mutter über 11 Jahre ( $p < 0,0001$ , Odds Ratio 3,927, 95%-KI 2,350–6,562),
2. Zufriedenheit mit der Betreuung in der Geburtsklinik ( $p = 0,0050$ , Odds Ratio 2,091, 95%-KI 1,250–3,499),
3. keine Nachsorge durch eine Hebamme ( $p = 0,0144$ , Odds Ratio 0,307, 95%-KI 0,119–0,790) und
4. negatives Erleben der Stillerfahrung ( $p = 0,0287$ , Odds Ratio 0,433, 95%-KI 0,204–0,917).

## Diskussion

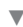

Von den 2007 in unserem Geburtskollektiv in Freiburg entbundenen Frauen entschieden sich 8% primär abzustillen. Diese Rate stimmt in etwa überein mit den Angaben aus der Literatur für Deutschland. In der SuSe-Studie über 1717 in Deutschland 1997/1998 geborene Kinder [14] ist die primäre Abstillrate mit 9% angegeben. Neuere Daten aus Bayern [15] zeigen bei 3822 Teilnehmern eine primäre Abstillrate von 10,5%. Deutlich abweichend davon wird bei ebenfalls 2005 geborenen Kindern aus einer Hamburger Klinik eine primäre Abstillrate von nur 3% angegeben [4]. Diese auffallend geringe Abstillrate kann möglicherweise durch das besondere Wöchnerinnenkollektiv eines Krankenhauses in einer wohl situierten Wohngegend erklärt werden. Während die Stillinitiationsrate in unserer Untersuchung hoch ist, kommt es im weiteren Verlauf zu einem deutlichen Abfall, am ausgeprägtesten nach etwa 8 Wochen (● Abb. 1). Die Stillquote von 74% nach 3 Monaten ist allerdings deutlich höher als die Berichte von 1998 mit 65% [14] und von 2005 mit 65% Stillquote in Bayern [15]. Nach 6 Monaten stillen in unserem Kollektiv noch 61%, in der SuSe-Studie 48% und in der bayrischen Erhebung 52%.

Auch nach 12 Monaten werden in unserer Untersuchung noch 28% der Säuglinge zumindest teilweise gestillt, während in der Untersuchung von vor 10 Jahren dieser Prozentsatz auf 13% abgefallen war [14]. Nach dem Tiefpunkt der Stillfrequenz in den 70er-Jahren und einer Renaissance des Stillbeginns in den 80er- und 90er-Jahren gibt es jetzt möglicherweise einen Trend zu längerem Stillen.

Als Begründung zum Abstillen wird in unserer Untersuchung zu *wenig Muttermilch* von 24% angegeben, *Kind oder Mutter wollten nicht mehr* von jeweils 14%. Identische Zahlen mit 14% für jeweils *Mutter oder Kind wollten nicht mehr* werden in der Untersuchung aus Hamburg angegeben [23]. Auch in dieser Untersuchung steht mit 44% die Begründung, nicht genügend Milch gehabt zu haben, an erster Stelle.

In unserem Kollektiv stillten ältere Mütter deutlich häufiger länger als 6 Monate im Vergleich zu jüngeren Frauen. Dieser Effekt ist durchgehend in allen publizierten Arbeiten erkennbar, z. B. in der prospektiven Kohortenstudie zum Stillverhalten in Bayern [22] oder in einer 2006 publizierten Kohortenstudie aus Kanada mit 856 Mutter-Kind-Paaren [2].

Frauen mit Migrationshintergrund stillen seltener primär ab, stillen aber häufig kürzer. Vergleiche mit anderen Untersuchungen sind sehr schwierig, da die Zusammensetzung der Kollektive sehr unterschiedlich ist und dieser Faktor sich bei unterschiedlicher Adaptation an das Einwanderungsland sehr unterschiedlich auswirken kann. Ein ähnliches Ergebnis wurde auch bei der bayrischen Untersuchung beschrieben mit längeren Stillzeiten für in Deutschland geborene Mütter [22].

Als einziger demografischer Faktor war das Bildungsniveau der Frau auch bei der multivariaten Analyse hoch signifikant. Frauen mit Hochschulzugangsberechtigung stillen deutlich länger als Frauen mit mittlerem oder niedrigem Bildungsabschluss. Dieser Effekt ist durchgängig in sämtlichen Untersuchungen zu verzeichnen [2, 15, 20, 22].

Die 43 frühgeborenen Kinder in unserem Untersuchungskollektiv wurden tendenziell seltener länger als 6 Monate gestillt. Statistische Signifikanz konnte durch die kleine Fallzahl nicht erreicht werden. In der bayrischen Untersuchung war die adjustierte Odds Ratio für Frühgeborene, primär abgestillt zu werden, 3,04 [15]. Es scheint eine besondere Herausforderung zu sein, nach einer Frühgeburt eine befriedigende Stillbeziehung aufzubauen. Interessant dazu ist eine Fallkontrollstudie aus Holland, die eine 63%ige Rate von brusternährten Frühgeborenen zeigte bei frühzeitiger Entlassung aus der Klinikbetreuung mit Magensonde im Gegensatz zu nur 36% brusternährten Frühgeborenen nach langem Krankenhausaufenthalt [18]. Der positive Einfluss einer hohen mütterlichen Bildung auf die Brusternährung von Frühgeborenen (60% sehr kleiner Frühgeborener wurden bei Entlassung ausschließlich brusternährt) wird aus Dänemark berichtet [27]. Ausschließliches Stillen ist bei einem frühgeborenen Kind schwieriger zu erreichen, als ein reifes Neugeborenes zu stillen, aber besonders positiv für die gesunde Entwicklung. Berichte in der Literatur zeigen geringere Stillraten für Frühgeborene im Vergleich zu reif geborenen Kindern, so auch in der bayrischen Untersuchung von Kohlhuber et al. [15].

Eine positive Vorerfahrung von Wöchnerinnen, die bereits ein Kind gestillt haben, sollte sich als eine längere Stillzeit bei Mehrgebärenden auswirken. So beschreiben es z. B. Schwegler et al. [22] mit statistisch signifikant längeren Stilldauern bei Müttern mit Stillererfahrung. Im Gegensatz dazu zeigte sich in unserer Untersuchung kein relevanter Unterschied bei Erstschwangeren oder Erstgebärenden im Vergleich zu Mehrgebärenden.

In unserem Kollektiv gibt es einen Einfluss des Geburtsmodus auf die Stillbeziehung. Sowohl spontan geborene Kinder als auch vaginal operativ entbundene und Kinder nach sekundärer Sectio werden zu einem hohen Prozentsatz länger als 6 Monate gestillt. Statistisch signifikant seltener werden die nach primärer Sectio geborenen Kindern länger als 6 Monate gestillt. Eine mögliche Erklärung dieses Unterschieds könnte die höhere Anzahl von kran-

ken Kindern, Frühgeburten und Müttern mit vorbestehenden Problemen sein, die das Stillen beeinträchtigen [9, 24]. Möglich wäre aber auch ein Einfluss der geringeren endogenen Oxytocinausschüttung in der Gruppe der primär durch Kaiserschnitt entbundenen Frauen. Ebenfalls eine erhöhte Rate an frühzeitigem Abstillen berichten Zanardo et al. [28] aus Italien und Haggkvist et al. aus Norwegen [8]. Die bayrische Untersuchung [22] zeigt ähnlich wie bei uns eine längere Stillzeit bei spontan geborenen Kindern, die in der multivariaten Analyse nicht mehr signifikant war. In dieser Untersuchung wurden aber nur 2 Gruppen gebildet: Spontan geborene Kinder versus vaginal operativ und primäre und sekundäre Kaiserschnitte in einer Kategorie. Der Geburtsmodus hatte in der vorliegenden Untersuchung keinen unabhängigen signifikanten Einfluss auf die Stilldauer (siehe multivariate Analyse).

Die negativen Auswirkungen von Zufüttern in den ersten Lebenstagen bzw. von Problemen und Notwendigkeit des Einsatzes von Hilfsmitteln ist in der Literatur mehrfach beschrieben. In der bayrischen Untersuchung [22] waren Zufüttern innerhalb der ersten Lebenstage und Stillprobleme hoch signifikant mit kürzeren Stillzeiten assoziiert. Die negativen Auswirkungen von Zufüttern in den ersten Tagen und von Schnullergebrauch werden aus 2 US-amerikanischen Untersuchungen berichtet [3, 6]. Auch die norwegische Untersuchung zeigt den negativen Einfluss des Zufütterns in den ersten Lebenstagen [8]. Diese Daten belegen, dass ein Zufüttern in den ersten Lebenstagen unbedingt von einer bestehenden medizinischen Indikation abhängig gemacht werden muss und auf keinen Fall ein Routineverfahren darstellt. Die Beobachtung der kürzeren Stilldauer, falls Hilfsmittel in den ersten Tagen benutzt werden, kann sicher auf das Vorhandensein von Problemen zurückgeführt werden und wird ebenfalls von anderen Untersuchern geschildert [17, 20].

Eine negative signifikante Korrelation zwischen Schnullergebrauch und Länge der Stillzeit wie in unserer Untersuchung wurde auch von anderen Untersuchern gefunden [20, 22]. Allerdings untersuchten Schwegler et al. und Roig et al. den Schnullergebrauch in den ersten Lebenstagen der Kinder, d. h. in der Phase des Initiierens der Stillbeziehung. In unserer Untersuchung fragten wir nach der Benutzung eines Schnullers im Alter von 3 Monaten.

Nachvollziehbar stillen Mütter, die die Stillzeit positiv erleben, ihre Kinder länger als Frauen, die mit dem Stillen Probleme haben. Die positive Korrelation ist in der bivariaten und in der multivariaten Analyse signifikant. Entscheidend für das Wohlbefinden von Mutter und Kind sind Fehlen von Stress und Zweifeln. Problematisch ist der entstehende Circulus vitiosus bei den sehr verbreiteten Zweifeln an der Milchmenge und dem dadurch erst entstehenden Stress mit Einschränkung der Oxytocinausschüttung und konsekutiver Hemmung des Let-down-Reflexes.

Die Wichtigkeit der Unterstützung zum Stillen durch den Partner der Frau ist in der Literatur mehrmals beschrieben worden. Die bayrische Untersuchung [15] und die Hamburger Untersuchung [13] zeigen den deutlichen Einfluss des Partners auf die Stillzeit. Erkrankten Mütter ohne medizinischen Grund zum Abstillen, sollte eine befriedigende Stillbeziehung ermöglicht werden. Bei den Müttern mit Wochenbettdepression besteht möglicherweise eine komplexe Wechselwirkung zwischen Stillen, Stillproblemen und Ausbruch der Krankheit. Die Beobachtung des früheren Abstillens bei depressiven Müttern wird unterstützt durch Berichte aus der Literatur, die ebenfalls vorzeitiges Abstillen bei Müttern mit Depression beschreiben [2, 5, 26].

Die in unserer Untersuchung beobachteten Unterschiede zwischen Frauen, die in der Universitäts-Frauenklinik, dem Diakonie-Krankenhaus und der Hebammenpraxis geboren hatten, sind mit Sicherheit durch unterschiedliche Frauenkollektive an den einzelnen Geburtsorten bedingt. Die multivariate Analyse zeigt, dass der Geburtsort keinen unabhängigen, signifikanten Einfluss auf den Stillerfolg hat. In der multivariaten Analyse stellt sich eine signifikante Korrelation zwischen der Stilldauer und der Zufriedenheit mit der Betreuung am Geburtsort heraus. In der bayrischen Untersuchung [22] wurde eine positive Korrelation zwischen ambulanter Geburt und längerer Stilldauer gefunden. Die positive Korrelation wurde durch einen höheren Anteil an Frauen mit größerem Interesse an Gesundheitsfragen in der Gruppe der ambulant gebärenden Frauen begründet. Ebenso relevant ist nach der Klinikentlassung die Nachsorge durch die Hebamme, auch diese positive Korrelation zur längeren Stillzeit blieb in der multivariaten Analyse bestehen.

### Schlussfolgerung

In unserer Untersuchung zeigt sich ein eindeutiger Effekt verschiedener Variablen auf die Stillbeziehung. Zu den beeinflussbaren Faktoren gehören: mehr Information über gesunde Säuglingsernährung und die Nachteile des Nichtstillens besonders für junge Eltern und bildungsferne Gesellschaftsbereiche, Schaffung einer befriedigenden Wochenbettatmosphäre, Vermeiden von Zufütterung in den ersten Tagen ohne medizinische Indikation und Ausräumung von Zweifeln an der Muttermilchmenge. Die Betreuung am Geburtsort sollte von kompetenten Fachkräften (Hebammen, Geburtshelfern und Kinderärzten) zur Zufriedenheit der Mutter übernommen werden, sodass ein positives Erleben das Stillen fördert. Auch nach dem meist kurzen Klinikaufenthalt ist eine Unterstützung und Beratung der Mutter durch die Hebamme, aber auch durch stillerfahrene Frauenärzte und Pädiater dringend notwendig.

### Fazit für die Praxis

Frauenärzte müssen fundierte Kenntnisse über Vorteile und Management des Stillens haben. Besonders erfahrene Betreuung sollte in den folgenden Situationen ermöglicht werden: bei jungen Müttern, Frauen aus bildungsfernen Bereichen, bei Krankheit oder Trennung von Mutter und Neugeborenem und nach Kaiserschnittentbindungen.

### Danksagung

Für die Beratung bei der Entwicklung des standardisierten Interviews und bei der Diskussion der Ergebnisse bedanken wir uns herzlich bei Prof. Walter Schuth. Für die Erstellung des Manuskripts gilt unser Dank Frau Heike Tröndle.

### Interessenkonflikt

Die Autoren erklären, dass keine finanziellen Verbindungen mit einer für den Artikel relevanten Firma bestehen.

### Literatur

- 1 Bartick M, Reinhold A. The burden of suboptimal breastfeeding in the United States: a pediatric cost analysis. *Pediatrics* 2010; 125: e1048–e1056
- 2 Clifford TJ, Campbell MK, Speechley KN et al. Factors influencing full breastfeeding in a southwestern ontario community: assessments at 1 week and at 6 months postpartum. *J Hum Lact* 2006; 22: 292–304
- 3 Declercq E, Labbok MH, Sakala C et al. Hospital practices and women's likelihood of fulfilling their intention to exclusively breastfeed. *Am J Public Health* 2009; 99: 929–935
- 4 Deneke C, Scheele M. QuaSti – Qualität im Stillfreundlichen Krankenhaus. *Frauenarzt* 2007; 48: 369–372
- 5 Dennis CL, McQueen K. Does maternal postpartum depressive symptomatology influence infant feeding outcomes? *Acta Paediatr* 2007; 96: 590–594
- 6 DiGirolamo AM, Grummer-Strawn LM, Fein SB. Effect of maternity-care practices on breastfeeding. *Pediatrics* 2008; 122 (Suppl. 2): S43–S49
- 7 Haager-Bürkert H, Niebuhr D, Kroke A et al. Perceived difficulties for clinics with maternity units in Germany in obtaining the certification "baby friendly hospital". *Geburtsh Frauenheilk* 2010; 70: 726–731
- 8 Haggkvist AP, Brantsaeter AL, Grijowski AM et al. Prevalence of breastfeeding in the Norwegian Mother and Child Cohort Study and health service-related correlates of cessation of full breast-feeding. *Public Health Nutr* 2010; 13: 2076–2086
- 9 Hartge DR, Dawson A, Bohlmann MK et al. Gravidas with a BMI above 25: challenges in antenatal and peripartum monitoring. *Geburtsh Frauenheilk* 2010; 70: 463–471
- 10 Ip S, Chung M, Raman G et al. Breastfeeding and maternal and infant health outcomes in developed countries. *Evid Rep Technol Assess (Full Rep)* 2007; 153: 1–186
- 11 Ip S, Chung M, Raman G et al. A summary of the Agency for Healthcare Research and Quality's evidence report on breastfeeding in developed countries. *Breastfeed Med* 2009; 4 (Suppl. 1): S17–S30
- 12 Jahnz E-M. Einflüsse und Bedingungen während der Stillzeit für Mutter und Kind im Freiburger Geburtenkollektiv. Freiburg: Albert-Ludwigs-Universität, Medizinische Fakultät; 2012
- 13 Jöllenbeck M, Deneke C, Seibt AC et al. Unterstützungswünsche für das Stillen. Stillen und Stillbereitschaft. *Frauenarzt* 2009; 6: 515–518
- 14 Kersting M, Dulon M. Assessment of breast-feeding promotion in hospitals and follow-up survey of mother-infant pairs in Germany: the SuSe Study. *Public Health Nutr* 2002; 5: 547–552
- 15 Kohlhuber M, Rebhan B, Schwegler U et al. Breastfeeding rates and duration in Germany: a Bavarian cohort study. *Br J Nutr* 2008; 99: 1127–1132
- 16 Lange C, Schenk L, Bergmann R. Ergebnisse des Kinder- und Jugend-surveys (KiGGS). Verbreitung, Dauer und zeitlicher Trend des Stillens in Deutschland. *Bundesgesundheitsbl* 2007; 50: 624–633
- 17 McKechnie AC, Eglash A. Nipple shields: a review of the literature. *Breastfeed Med* 2010; 5: 309–314
- 18 Meerlo-Habing ZE, Kusters-Boes EA, Klip H et al. Early discharge with tube feeding at home for preterm infants is associated with longer duration of breast feeding. *Arch Dis Child Fetal Neonatal Ed* 2009; 94: F294–F297
- 19 Merten S, Dratva J, Ackermann-Lieblich U. Do baby-friendly hospitals influence breastfeeding duration on a national level? *Pediatrics* 2005; 116: e702–e708
- 20 Roig AO, Martinez MR, Garcia JC et al. Factors associated to breastfeeding cessation before 6 months. *Rev Lat Am Enfermagem* 2010; 18: 373–380
- 21 Schneider C. Soziodemographische Bedingungen im Freiburger Entbindungskollektiv und deren Einflüsse auf Stillen und Ernährung des Säuglings. Freiburg: Albert-Ludwigs-Universität, Medizinische Fakultät; 2010
- 22 Schwegler U, Kohlhuber M, Twardella D et al. Einfluss der Stillbedingungen in den ersten Lebenstagen auf die Dauer des ausschließlichen Stillens. *Geburtsh Frauenheilk* 2008; 68: 607–614
- 23 Seibt A, Deneke C, Juppe-Schütz T et al. Wirksamkeit eines babyfreundlichen Krankenhauses aus Sicht der Nutzerinnen. *Laktation und Stillen* 2008; 1: 12–18
- 24 Simoes E, Kunz SK, Münnich R et al. Informed consent for cesarean delivery: method-associated morbidity gradients require the participation of pregnant women. *Geburtsh Frauenheilk* 2010; 70: 732–738
- 25 Stuebe A. The risks of not breastfeeding for mothers and infants. *Rev Obstet Gynecol* 2009; 2: 222–231

- 26 Watkins S, Meltzer-Brody S, Zolnoun D et al. Early breastfeeding experiences and postpartum depression. *Obstet Gynecol* 2011; 118 (2 Pt 1): 214–221
- 27 Zachariassen G, Faerk J, Grytter C et al. Factors associated with successful establishment of breastfeeding in very preterm infants. *Acta Paediatr* 2010; 99: 1000–1004
- 28 Zanardo V, Svegliado G, Cavallin F et al. Elective cesarean delivery: does it have a negative effect on breastfeeding? *Birth* 2010; 37: 275–279
